# Supplementary material
Source: PubMed Central journal article supplement (PMC3927413)
Supplement: NIHMS436901-supplement-1.pdf [file NIHMS436901-supplement-1.pdf]

# Supplementary Figure 1

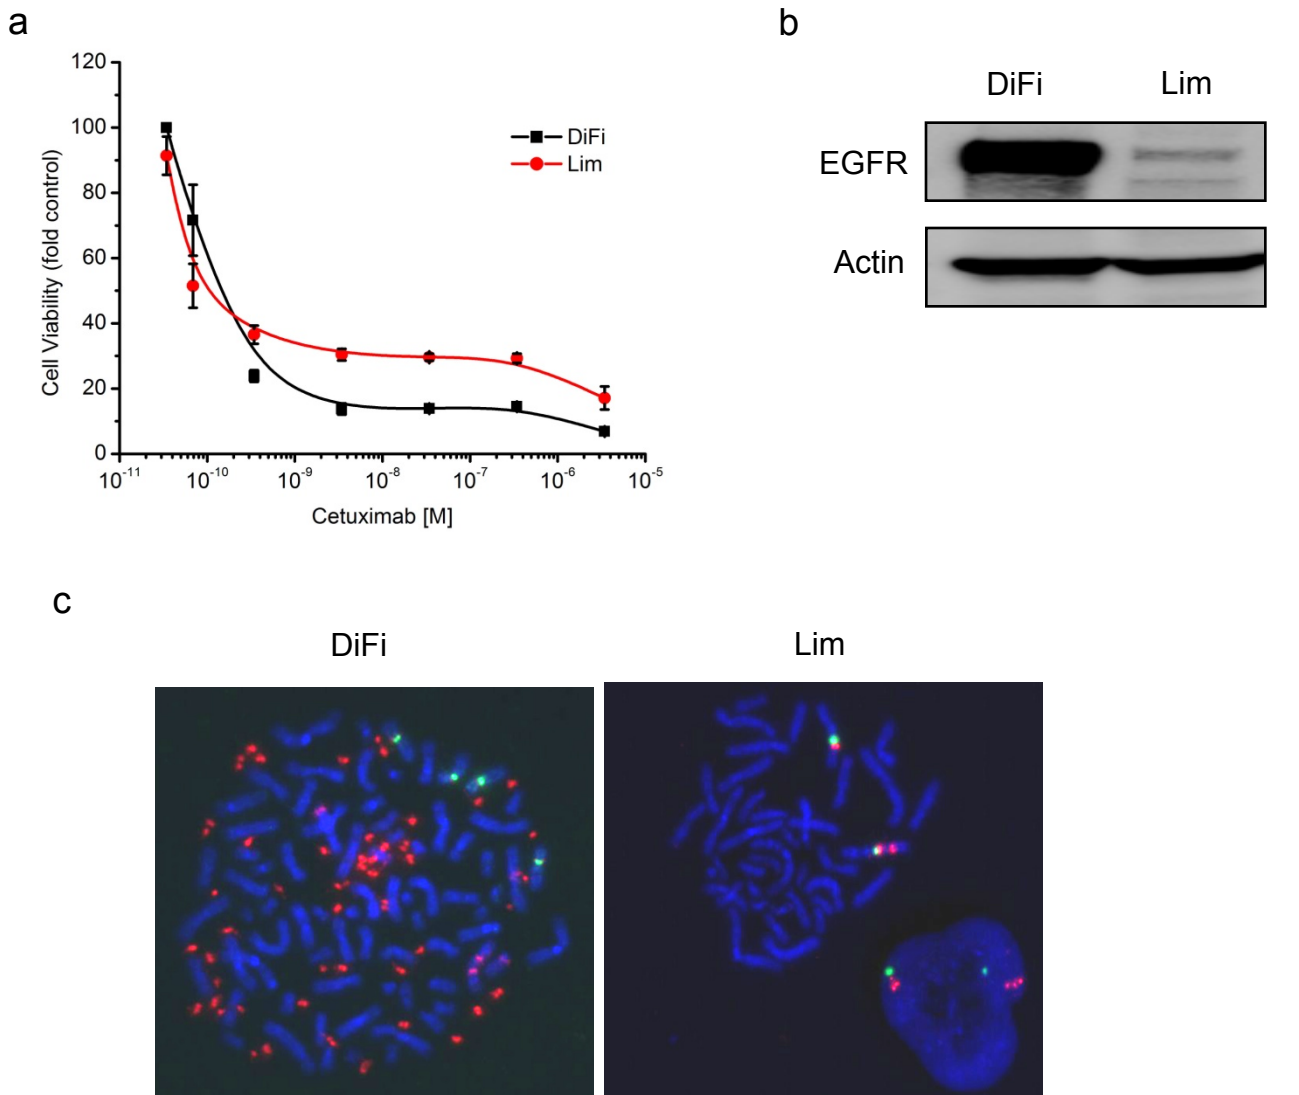

**Sensitivity to cetuximab of the DiFi and LIM1215 parental cell lines** (a) The indicated cell lines were treated for one week with increasing doses of cetuximab. Cell viability was assayed by the ATP assay. Data points represent means  $\pm$  SD of three independent experiments. (b) Western blot analysis of EGFR expression levels in DiFi and Lim1215 cells. (c) FISH analysis of the EGFR gene in DiFi and Lim1215 cell lines. Red EGFR gene probe; Green Chr 7 centromeric probe.

# Supplementary Figure 2

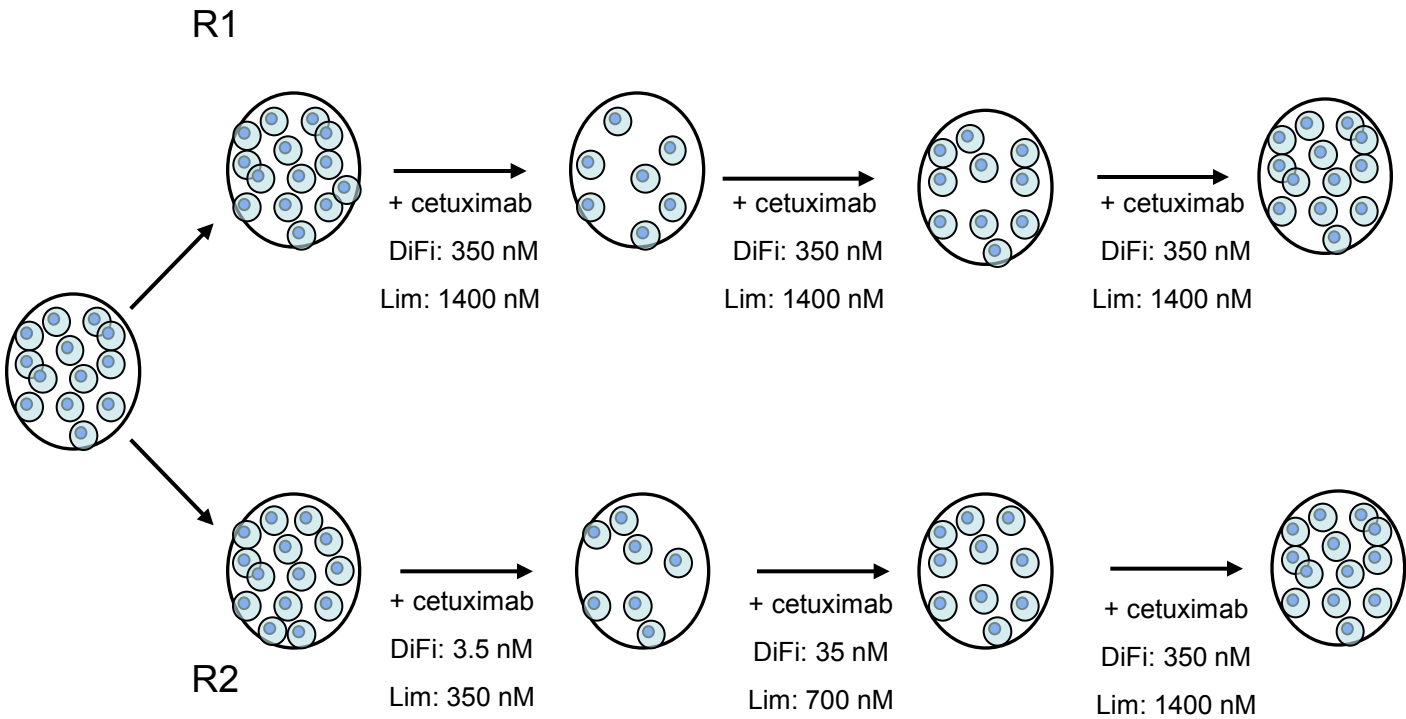

R1: Constant dosage

R2: Incremental dosage

**Schematic representation of the strategy used to derive cetuximab resistant cell lines.** The concentrations of drug and the protocols (constant and incremental) are illustrated.

# Supplementary Figure 3

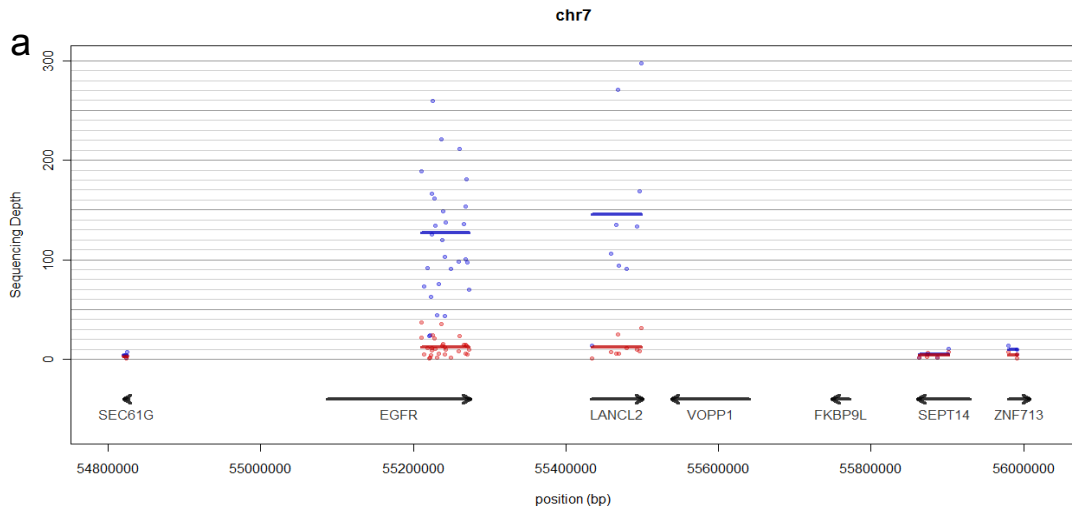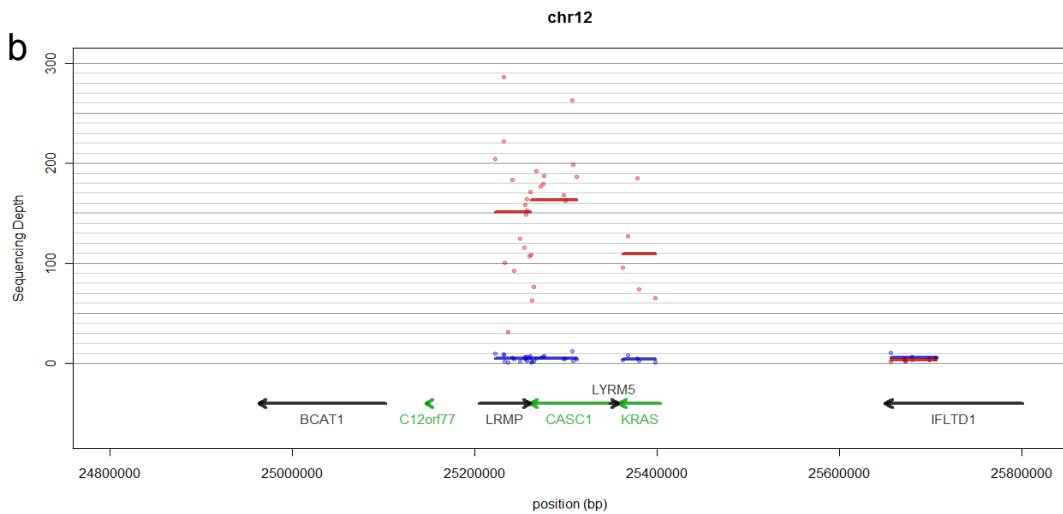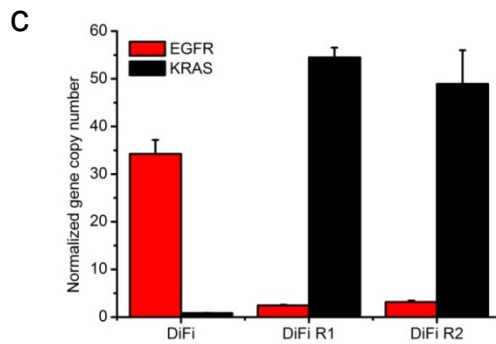

**Acquired resistance to cetuximab is associated with focal amplification of the KRAS locus in DiFi cells (a-b)** High resolution analysis of EGFR and KRAS amplicons in parental and cetuximab resistant DiFi cells. Dots represent exon-averages while segments are gene-averages of the sequencing depth (blue: parental DiFi; red: resistant DiFi). (c) The number of copies corresponding to the EGFR and KRAS loci was determined by real-time quantitative PCR using gDNA extracted from DiFi parental, R1 and R2 cells. Primers designed to span centromeric regions of chromosomes 7 or 12 were employed to normalize data for aneuploidy. Genomic DNA from a diploid cell line (HCEC) was used as a reference control

## Supplementary Figure 4

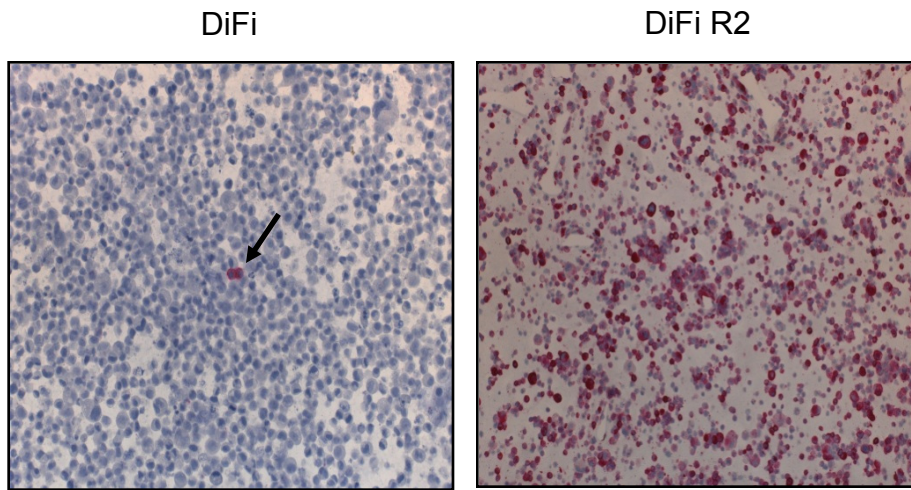

**KRAS amplified cells are present in DiFi cells before cetuximab treatment.** Immunostaining of KRAS protein in DiFi parental and resistant cells shows the presence of KRAS over expressing cells in the parental population.

# Supplementary Figure 5

a

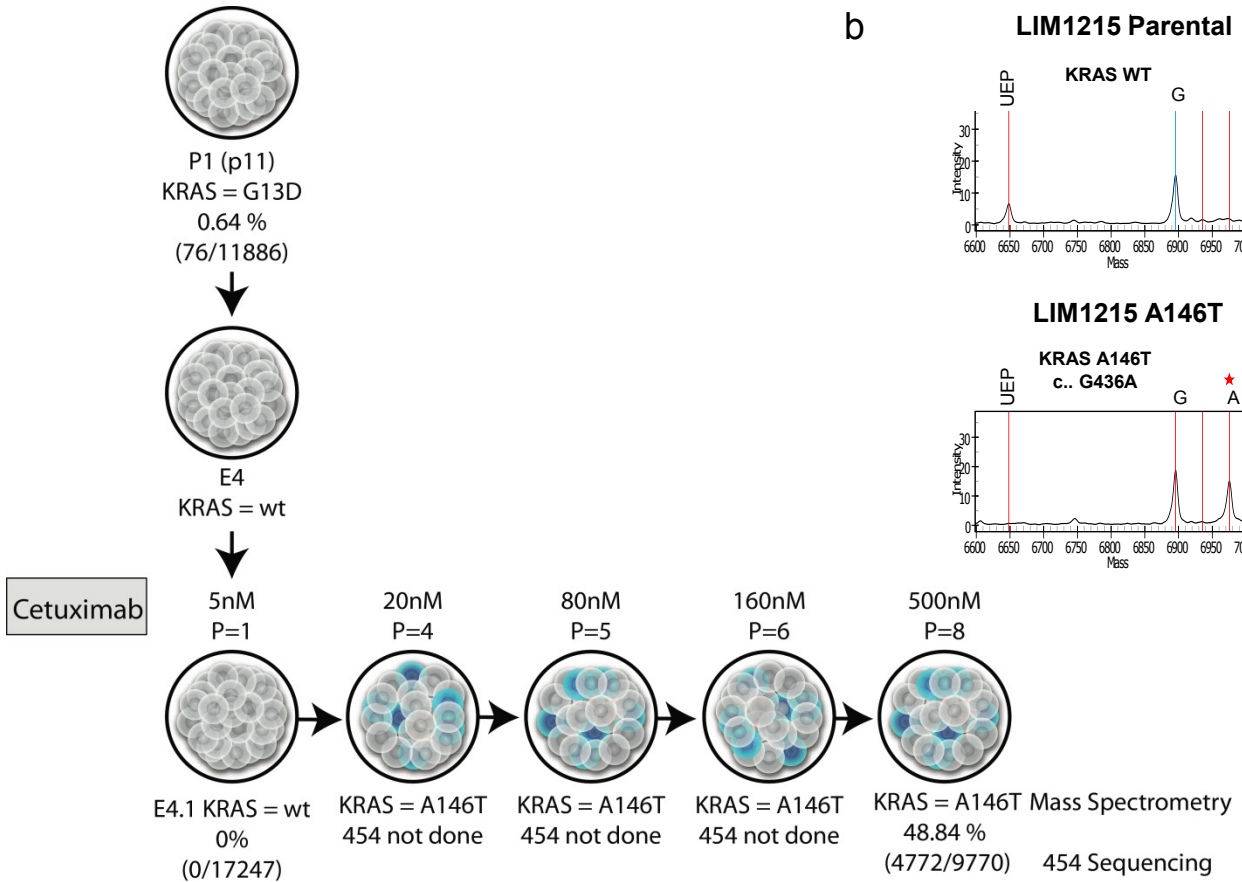

b

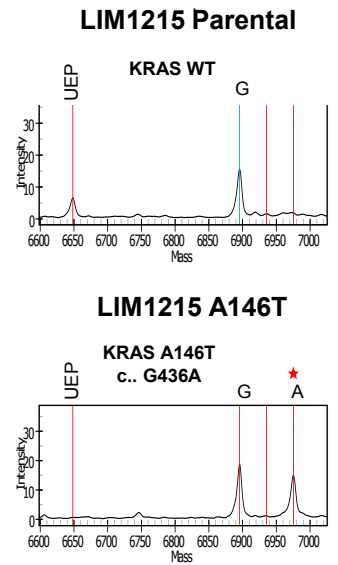

c

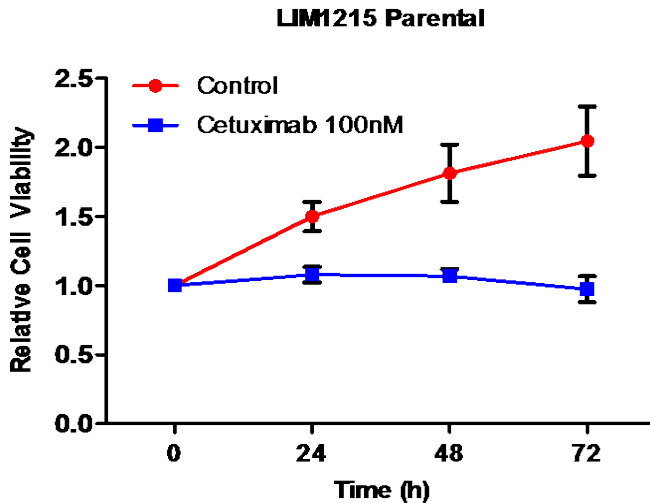

d

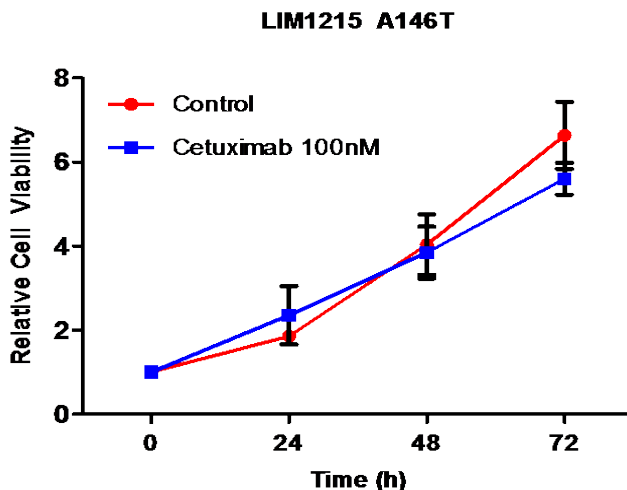

e

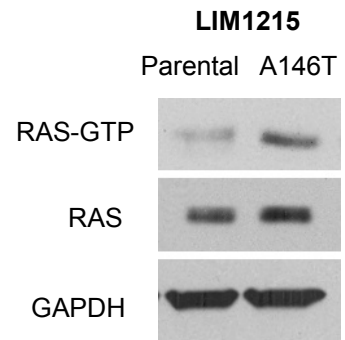

**KRAS mutations can arise 'de novo' during cetuximab treatment.** (a) Schematic representation of the protocol used to obtain a KRAS wild type Lim1215 clone and to derive its cetuximab resistant variants. (b) Mass Spectrometry analysis of Lim1215 E4.1 cetuximab resistant cells showing the KRAS nucleotide change at codon 146 (G436A). (c) Proliferation of the Lim1215 KRAS WT subclone E4.1 is impaired by cetuximab treatment. (d) KRAS A146T resistant cells derived from the E4.1 subclone are fully insensitive to cetuximab. (e) KRAS A146T cetuximab resistant cells display active GTP-RAS, as assessed by GST-Raf1 pull-down. Whole-cell extracts were blotted total RAS antibody, while GAPDH was included as a loading control.

# Supplementary Figure 6

a

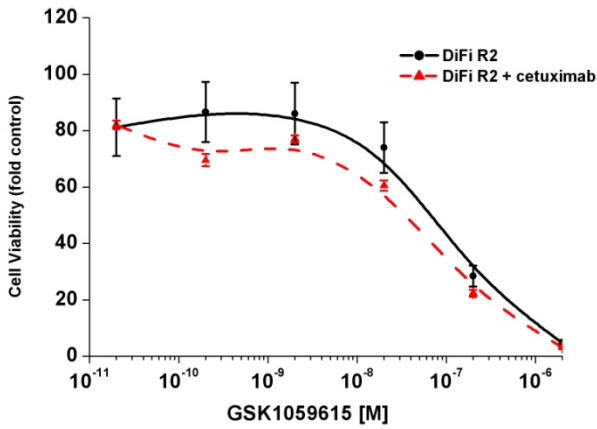

b

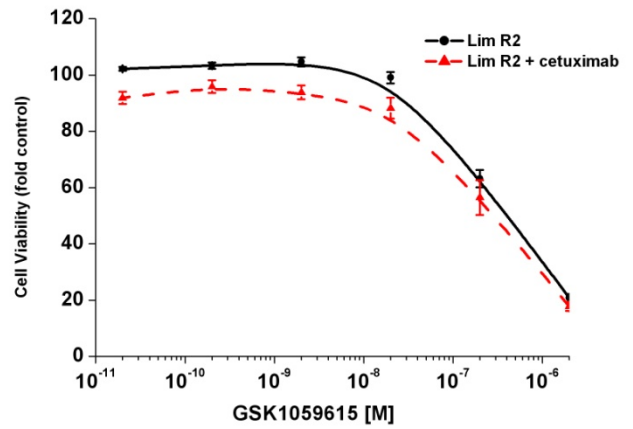

c

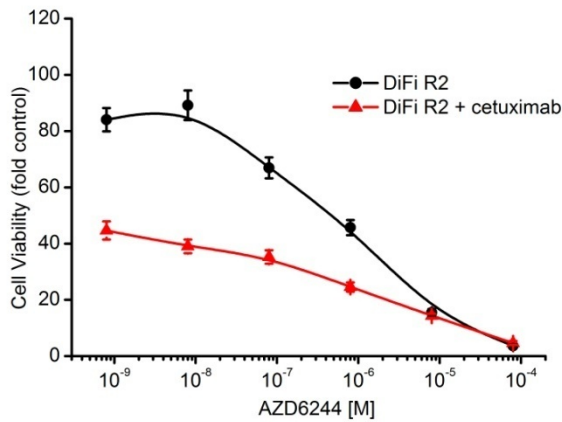

d

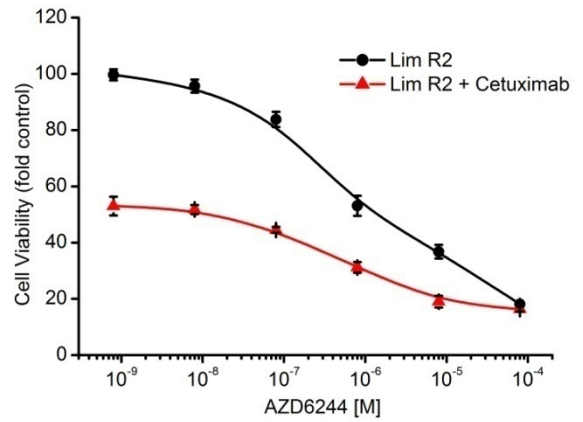

e

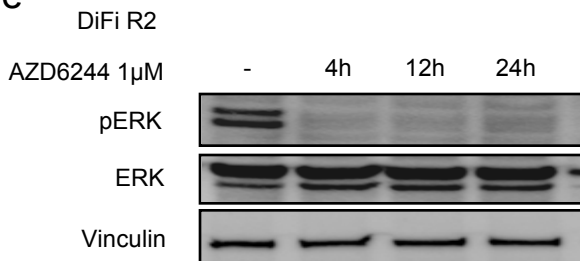

f

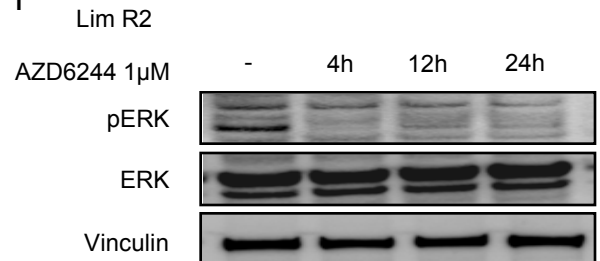

**Combinatorial inhibition of EGFR and MEK is effective in cells with acquired resistance to cetuximab (a-d)** Cetuximab-resistant DiFi or Lim1215 cells were treated with a constant dose of cetuximab (70 nM) and/or with increasing doses of the PI3K inhibitor GSK1059615 (a-b) or MEK inhibitor AZD6244 (c-d) for one week. Cell viability was assayed by the ATP assay. Data points represent means  $\pm$  SD of three independent experiments. (e-f) Western blot analysis of phosphorylated ERK expression and activation in the indicated cell lines treated with cetuximab (350 nM for DiFi R2 and 1400 nM for Lim1215 R2) and AZD6244 1  $\mu$ M.

# Supplementary Figure 7

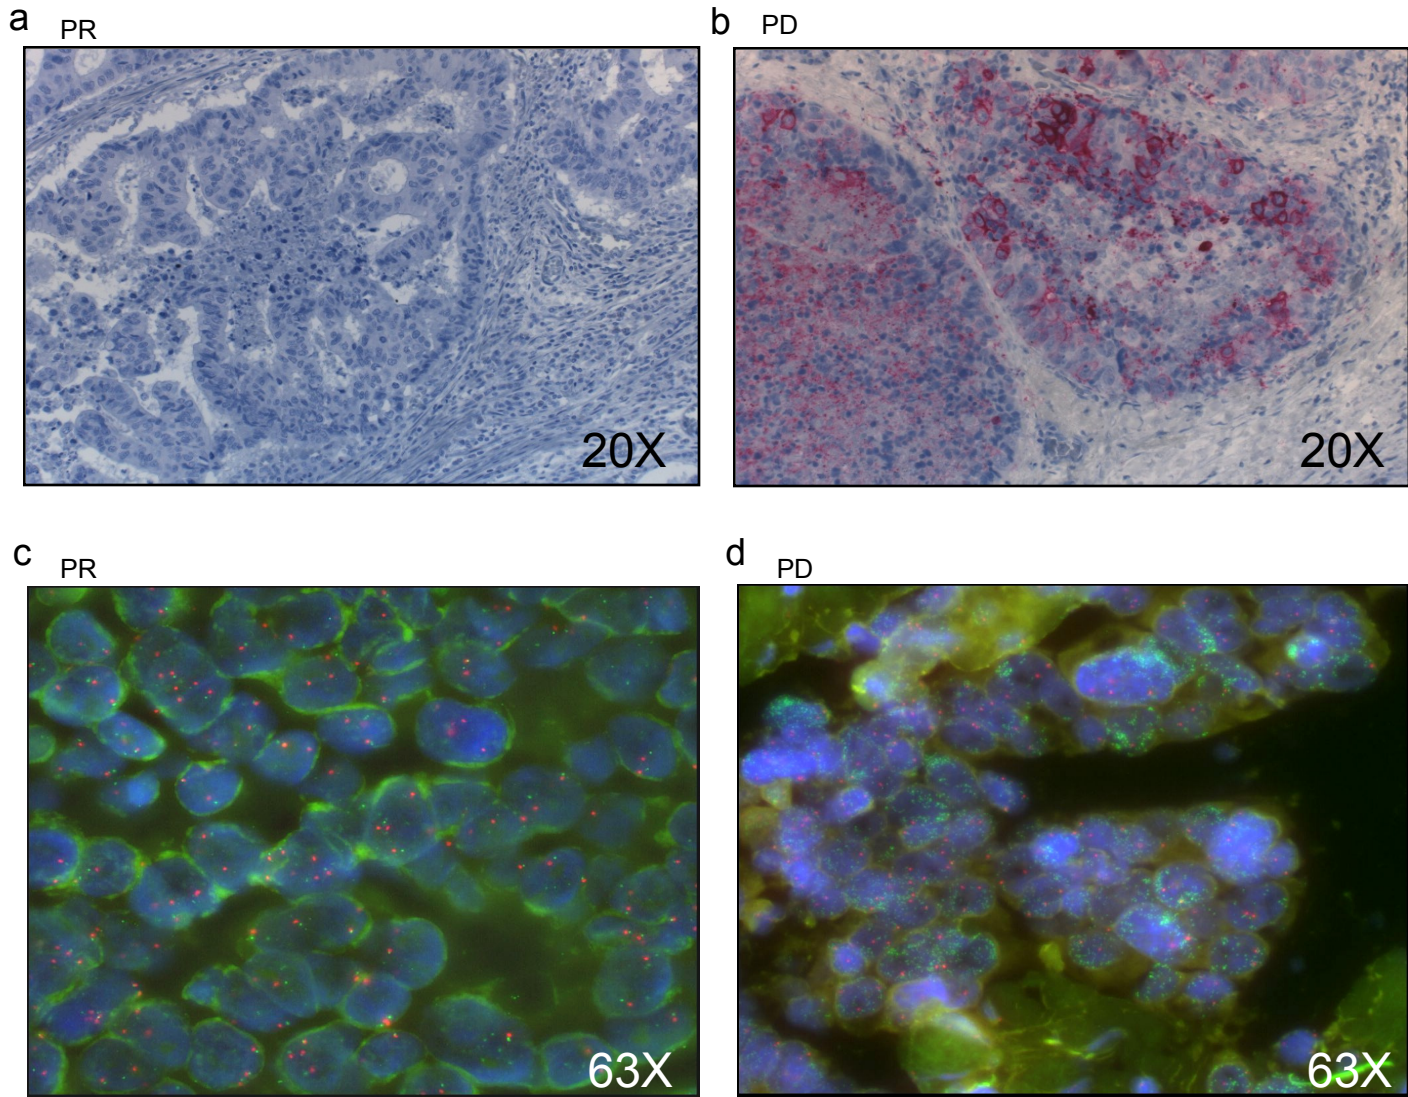

**Acquired resistance to cetuximab is associated with focal amplification of the KRAS locus in colorectal tumors (a-b)** Immunohistochemical analysis of KRAS protein expression in tumor tissues before (PR) and after (PD) development of resistance to cetuximab. (c-d) FISH analysis of the KRAS gene in the same patient. Red Chr12 centromeric probe; Green KRAS gene probe.

## Supplementary Table 1

| <b>KRAS Mutations</b> | <b>Lim</b> | <b>Lim R1</b> | <b>Lim R2</b> |
|-----------------------|------------|---------------|---------------|
| <b>G12R</b>           | 0%         | 20%           | 0%            |
| <b>G13D</b>           | 0.22%      | 0%            | 47%           |

**KRAS mutant cells are present in Lim1215 cells before cetuximab treatment.** Percentage of KRAS mutant alleles in parental and cetuximab resistant Lim1215 cells as measured by BEAMing.



# Supplementary Table 2

| Patient ID  | Gender | Site of primary tumor   | Anti-EGFR treatment                           |  | Irinotecan refractory | Best Response | Duration of treatment | Time of biopsy after progression | Site of mutational analysis |                              | FFPE/Frozen | BRAF mutational status | PIK3CA mutational status |
|-------------|--------|-------------------------|-----------------------------------------------|--|-----------------------|---------------|-----------------------|----------------------------------|-----------------------------|------------------------------|-------------|------------------------|--------------------------|
|             |        |                         | monoclonal antibody/CT                        |  |                       |               |                       |                                  | anti-EGFR sensitive         | anti-EGFR resistant          |             |                        |                          |
| Patient #1  | M      | rectum                  | panitumumab + irinotecan                      |  | yes                   | SD            | 20 months             | 6 months                         | rectum                      | liver                        | FFPE        | wt (exon 15)           | wt (exons 9-20)          |
| Patient #2  | M      | ascending colon         | panitumumab + irinotecan                      |  | yes                   | PR            | 6 months              | 12 months                        | liver                       | R chest wall subcut nodule   | FFPE        | wt (exon 15)           | wt (exons 9-20)          |
| Patient #4  | F      | sigmoid colon           | cetuximab + irinotecan                        |  | no                    | SD            | 5 months              | 7 months                         | colon                       | lung                         | FFPE        | wt (exon 15)           | not done                 |
| Patient #5  | F      | sigmoid colon           | cetuximab + irinotecan                        |  | yes                   | PR            | 7 months              | 1 month                          | colon                       | liver                        | FFPE        | wt (exon 15)           | wt (exons 9-20)          |
| Patient #6  | M      | cecum                   | cetuximab + FOLFIRI                           |  | no                    | PR            | 21 months             | 14 months                        | liver                       | liver                        | FFPE        | wt (exon 15)           | wt (exons 9-20)          |
| Patient #7  | M      | sigmoid colon           | cetuximab + irinotecan; panitumumab + FOLFIRI |  | no                    | SD            | 25 months             | 1 month                          | liver                       | cerebellum                   | FFPE        | wt (exon 15)           | not done                 |
| Patient #8  | M      | sigmoid colon           | cetuximab + irinotecan                        |  | yes                   | PR            | 18 months             | 1 month                          | liver                       | liver                        | FFPE        | wt (exon 15)           | wt (exons 9-20)          |
| Patient #9  | M      | rectum                  | cetuximab + irinotecan                        |  | yes                   | PR            | 20 months             | 1 month                          | liver                       | liver                        | FFPE        | wt (exon 15)           | wt (exons 9-20)          |
| Patient #10 | F      | sigmoid colon           | panitumumab                                   |  | yes                   | PR            | 13 months             | 4 months                         | liver                       | liver                        | FFPE        | wt (exon 15)           | wt (exons 9-20)          |
| Patient #11 | F      | sigmoid-rectum junction | panitumumab                                   |  | yes                   | PR            | 12 months             | 1 month                          | paraaortic lymph nodes      | liver/paraaortic lymph nodes | FFPE        | wt (exon 15)           | wt (exons 9-20)          |

| Patient ID  | Gender | Site of primary tumor | Previous chemotherapy                   | Best Response | Duration of treatment | Time of biopsy after progression | Site of analysis | FFPE/Frozen | BRAF mutational status | PIK3CA mutational status |
|-------------|--------|-----------------------|-----------------------------------------|---------------|-----------------------|----------------------------------|------------------|-------------|------------------------|--------------------------|
|             |        |                       |                                         |               |                       |                                  |                  |             |                        |                          |
| Patient #14 | M      | ascending colon       | FOLFOX                                  | PR            | 5 months              | 1 month                          | ascending colon  | FFPE        | wt (exon 15)           | wt (exons 9-20)          |
| Patient #15 | M      | sigmoid colon         | FOLFOX + bevacizumab                    | SD            | 3 months              | 2 months                         | liver            | FFPE        | wt (exon 15)           | wt (exons 9-20)          |
| Patient #16 | F      | sigmoid colon         | FOLFOX + bevacizumab; bevacizumab alone | PR            | 9 months; 14 months   | 1.5 months                       | liver            | FFPE        | wt (exon 15)           | wt (exons 9-20)          |
| Patient #17 | M      | sigmoid colon         | FOLFOX                                  | PR            | 5 months              | 2 months                         | liver            | FFPE        | wt (exon 15)           | wt (exons 9-20)          |
| Patient #18 | M      | descending colon      | FOLFOX; HAI FUDR + 5FU/LV               | CR            | 5 months; 2 months    | 18 months                        | liver            | FFPE        | wt (exon 15)           | wt (exons 9-20)          |
| Patient #19 | F      | ascending colon       | capecitabine + bevacizumab              | adjuvant      | 6 months              | 6 months                         | liver            | FFPE        | wt (exon 15)           | wt (exons 9-20)          |
| Patient #21 | F      | sigmoid colon         | FOLFOX                                  | PR            | 3 months              | 1 month                          | sigmoid colon    | FFPE        | wt (exon 15)           | wt (exons 9-20)          |

FFPE:Formalin Fixed Paraffin Embedded

## Patients' clinical characteristics

# Supplementary Table 3

a

| Patient ID  | Anti EGFR sensitive tumor<br>KRAS Mutational status<br>(Sanger sequencing on tumor) | Anti EGFR resistant tumor<br>KRAS Mutational status<br>(Sanger sequencing on tumor) |
|-------------|-------------------------------------------------------------------------------------|-------------------------------------------------------------------------------------|
| Patient #1  | wt                                                                                  | wt                                                                                  |
| Patient #2  | wt                                                                                  | wt                                                                                  |
| Patient #4  | wt                                                                                  | wt                                                                                  |
| Patient #5  | wt                                                                                  | wt                                                                                  |
| Patient #6  | wt                                                                                  | wt                                                                                  |
| Patient #7  | wt                                                                                  | wt                                                                                  |
| Patient #8  | wt                                                                                  | Q61H                                                                                |
| Patient #9  | wt                                                                                  | wt                                                                                  |
| Patient #10 | wt                                                                                  | wt                                                                                  |
| Patient #11 | wt                                                                                  | wt – KRAS amplified                                                                 |

b

| Patient ID  | Anti EGFR sensitive tumor<br>KRAS Mutational status<br>(454 <sup>a</sup> or BEAMing <sup>b</sup> on tumor) | Anti EGFR resistant tumor<br>KRAS Mutational status<br>(454 <sup>a</sup> or BEAMing <sup>b</sup> on tumor) |
|-------------|------------------------------------------------------------------------------------------------------------|------------------------------------------------------------------------------------------------------------|
| Patient #2  | wt <sup>a</sup>                                                                                            | G13D <sup>a</sup>                                                                                          |
| Patient #7  | wt <sup>a</sup>                                                                                            | wt <sup>a</sup>                                                                                            |
| Patient #8  | wt <sup>b</sup>                                                                                            | Q61H <sup>b</sup>                                                                                          |
| Patient #9  | wt <sup>b</sup>                                                                                            | G12D <sup>b</sup><br>G13D <sup>b</sup>                                                                     |
| Patient #10 | wt <sup>b</sup>                                                                                            | wt <sup>b</sup>                                                                                            |
| Patient #11 | wt <sup>b</sup>                                                                                            | wt <sup>b</sup>                                                                                            |

**Sanger sequencing analysis of KRAS gene** (a) Sanger sequencing analysis of KRAS gene in colorectal cancer patients tumors before and after resistance to anti-EGFR therapies. (b) Deep sequencing analysis of KRAS gene in colorectal cancer patients tumors before and after resistance to anti-EGFR therapies.

# Supplementary Table 4

a

| Patient ID  | Anti EGFR sensitive<br>KRAS mutational status <b>in plasma</b> |             |                    | Anti EGFR resistant<br>KRAS mutational status <b>in plasma</b> |               |                       |
|-------------|----------------------------------------------------------------|-------------|--------------------|----------------------------------------------------------------|---------------|-----------------------|
|             | Mutation                                                       | Percentage  | Events             | Mutation                                                       | Percentage    | Events                |
| Patient #8  | wt                                                             | 0.1%        | 4/46300            | Q61H                                                           | 1.12%         | 731/65400             |
| Patient #9  | wt                                                             | 0.03%<br>0% | 3/11600<br>0/16800 | G12D<br>G13D                                                   | 0.48%<br>3.3% | 89/18400<br>427/12500 |
| Patient #10 | wt                                                             | 0%          | 0/85500            | wt                                                             | 0%            | 0/14200               |

b

| Patient ID  | KRAS mutational status <b>in plasma samples</b> |                              |                             | KRAS mutational status <b>in tumor biopsy</b> |
|-------------|-------------------------------------------------|------------------------------|-----------------------------|-----------------------------------------------|
| Patient #8  | <i>December 2009</i>                            | <i>April 2010</i>            | <i>January 2011</i>         | <i>February 2011</i>                          |
|             | 0.01% (Q61H)                                    | 0.32% (Q61H)                 | 1.12% (Q61H)                | 17.3% (Q61H)                                  |
| Patient #9  | <i>January 2011</i>                             | <i>March 2011</i>            | <i>April 2011</i>           | <i>September 2011</i>                         |
|             | 0.03% (G12D)<br>0% (G13D)                       | 0.71% (G12D)<br>1.27% (G13D) | 0.48% (G12D)<br>3.3% (G13D) | 0.04% (G12D)<br>0.44% (G13D)                  |
| Patient #10 | <i>July 2010</i>                                | <i>April 2011</i>            | <i>August 2011</i>          | <i>November 2011</i>                          |
|             | 0%                                              | 0%                           | 0%                          | 0%                                            |

**BEAMing analysis of KRAS mutational status in plasma samples** (a) Detection of mutated KRAS alleles in plasma of colorectal cancer patients before and after resistance to anti EGFR therapies. (b) Measurements of mutant KRAS in serial plasma samples and in biopsies. The time course of plasma and biopsic sampling is indicated.
